# Supplementary material
Source: publisher figshare collection journal article supplement (https://gsajournals.figshare.com/ndownloader/files/24314912)
Supplement: Supplementary file 1 [file 24314912]

## Sheet: Guide
Tab	Notes
Guide	A guide to the information contained in this Data Set
Proliferation Rates	Compiled data for the opaque transcriptional regulator knockout library BSA proliferation screen. (A-C) The TFKO#, orf19 number, and name for the 188 regulator deletion strains included in this screen. (D-F) Lists of regulators with Slow and/or Late Phenotypes as well as whether they also exhibited a general, as opposed to BSA specific growth defect. (G-L) The Normalized Maximum Proliferation Rat…

## Sheet: Proliferation Rates
			Phenotype			Normalized Maximum Proliferation Rates						Normalized Time to Maximum Proliferation
TFKO#	ORF	Name	Slow Proliferation	Late Proliferation	General Defect	BSA Round 1	BSA Round 2	BSA Round 3	Lohse et al. 2016 Ammonium Sulfate (SCD+aa+Uri) Proliferation Screen	Ammonium Sulfate Round 2	Ammonium Sulfate Round 3	BSA Round 1	BSA Round 2	BSA Round 3	Notes
1	orf19.454	SFL1				0.764403			0.900915			1.02222
2	orf19.921	HMS1				1.35648			0.978626			1.12593
3	orf19.1069	RPN4				0.934763			0.834385			1.33704
4	orf19.1253	PHO4				1.27573			0.916244			1.00741
5	orf19.1499	CTF1				0.968513			0.97125			1.12963
6	orf19.2646	ZCF13				1.19835			0.933781			1.07778
7	orf19.2647	ZCF14				1.11238			0.92655			0.955556
8	orf19.2730	2730				1.0582			1.06414			1.01852
9	orf19.2748	ARG83				1.27922			0.973873			1.02963
10	orf19.3188	TAC1				1.23903			1.01333			1.11852
11	orf19.3190	HAL9				1.22447			1.05916			1.08148
12	orf19.3305	ZCF17				0.917148			0.982067			1.06296
13	orf19.3308	STB5				0.871463	1.12566		0.97475	0.766337		1.01111	0.968254
14	orf19.3434	TRY5				0.599864	1.11458		1.01433	0.753038		1.11852	0.904762
15	orf19.3753	SEF1				1.17969			0.94312			1.10741
16	orf19.3809	BAS1				1.06347			0.908595			1.10741
17	orf19.3876	ZCF19				1.13684			0.950229			1.17037
18	orf19.3912	GLN3				1.09145	0.886662		0.798173	0.274186		1	0.846561
19	orf19.3928	3928				1.05386			0.96983			1.08519
20	orf19.3969	SFL2				1.22105			1.04653			1.06667
21	orf19.4000	GRF10		YES	YES	1.12162	1.1306		1.05054	0.732563		1.49575	1.87017
22	orf19.4056	BRG1				1.25529	0.480389	0.671227	0.91627	0.705442	0.848685	0.949008	2.46429	1.69613
23	orf19.4145	ZCF20				0.988656			0.908233			0.959259
24	orf19.4166	ZCF21	YES		YES	0.536829	0.378202		0.745927	0.668164		1.15864	2.18939
25	orf19.4225	LEU3				0.66368	1.11545		0.913616	0.743025		0.966667	1.0947
26	orf19.4251	ZCF22				1.07641			1.15892			0.996296
27	orf19.4288	CTA7				1.16169			1.02962			1.1963
28	orf19.4438	RME1				1.15417			1.04244			0.955556
29	orf19.4450	ZCF23				0.586642	0.913364		0.97537	0.67735		1.01481	1.1455
30	orf19.4524	ZCF24				1.11396			0.996994			1.04444
31	orf19.4568	ZCF25				1.04171			0.913691			1.17407
32	orf19.4662	RLM1				1.14962			1.04508			0.974074
33	orf19.4670	CAS5				0.983215			1.08559			0.9681
34	orf19.4722	RTG1				1.12761			0.999365			1.05132
35	orf19.4778	LYS142				1.05231			0.867787			0.993065
36	orf19.4853	HCM1	YES		YES	0.640405	0.709986		0.748603	0.616849		1.06519	1.4
37	orf19.4941	TYE7				1.26414			0.964743			1.0319
38	orf19.4972	OFI1				1.36836			0.957244			1.0846
39	orf19.5001	CUP2				1.13861			0.915264			0.9681
40	orf19.5026	5026				0.741654	0.80622		0.879631	0.840155		1.28612	1.51934
41	orf19.5097	CAT8				1.04044			0.966416			1.0208
42	orf19.5133	ZCF29				1.11776			0.94744			1.02358
43	orf19.5251	ZCF30				1.21353			0.918805			1.05132
44	orf19.5326	MIG2				1.21293			1.02151			1.01526
45	orf19.5338	GAL4				1.1151	1.28273		0.912274	0.623595		0.851595	0.960317
46	orf19.5380	LYS144				1.15768			1.04025			1.0846
47	orf19.5498	EFH1				0.993082			1.06255			1.043
48	orf19.5548	LYS14				0.947361			0.981266			1.00416
49	orf19.5651	5651				1.2293			0.902677			1.27323
50	orf19.5849	CWT1				1.16934			1.04462			0.987517
51	orf19.5855	MBP1				1.07285			0.948206			0.951456
52	orf19.5917	STP1	YES	YES		NA	NA		0.976392	0.948579		NA	NA		No Growth, BSA Specific
53	orf19.5924	ZCF31				1.27656			0.9898			1.0319
54	orf19.5940	ZCF32				1.14954			0.956087			0.998613
55	orf19.5975	TRY4				1.19076			0.959609			0.993065
57	orf19.6038	UGA32				1.04819			0.97801			0.912621
58	orf19.6102	RCA1				0.829041			0.671155			1.13314
60	orf19.6182	ZCF34				0.94908			0.886115			1.06796
61	orf19.6514	CUP9				1.00914	1.0725		0.84376	0.837728		0.832178	0.785714
62	orf19.6824	TRY6				1.10807			0.957914			1.05687
63	orf19.6874	6874				1.05836	1.0644		0.867672	0.90813		0.851595	0.767196
64	orf19.7017	YOX1				1.1841			1.02954			1.03467
65	orf19.7068	MAC1	YES	YES	YES	0.363295	0.175949		0.657164	0.788518		1.5423	2.33929
66	orf19.7317	UGA33				1.02105			0.980958			1.03853
67	orf19.7319	SUC1				0.940754			1.05518			1.15229
68	orf19.7359	CRZ1				1.06109			0.941986			1.05688
69	orf19.7372	MRR1				0.976865			0.966765			1.24404
70	orf19.7374	CTA4				0.719572	1.28094		1.04707	0.951498		1.12661	0.996212
71	orf19.7518	ZCF38				0.948728			0.95459			1.05688
72	orf19.7570	UGA3				0.871346			0.935979			1.10826
73	orf19.7583	ZCF39				0.965437			0.984935			1.15596
74	orf19.166	ASG1				0.664893	0.996846		0.775877	0.668701		1.09725	1.18561
75	orf19.217	217				1.05838			0.961138			1.02752
76	orf19.255	ZCF1				1.06377			0.941504			1.28073
77	orf19.391	UPC2				1.16094			0.977991			1.30275
78	orf19.431	ZCF2				0.939528			0.921082			1.31743
79	orf19.517	HAP31	YES		YES	0.705231	0.46642		0.728792	0.617206		1.06516	1.60357
80	orf19.681	HAP43				0.939766			1.01803			1.29908
81	orf19.837.1	INO4				0.783644			0.680877			1.03116
82	orf19.909	STP4				0.831544			0.930055			1.36881
83	orf19.971	SKN7				0.878091			1.03462			1.1156
84	orf19.1032	SKO1				0.914289			0.976419			1.07156
85	orf19.1035	WAR1				1.20395			0.970765			1.36881
86	orf19.1168	ZCF3				0.927193	0.949488		0.920869	0.867761		1.57798	1.25132
87	orf19.1228	HAP2	YES	YES	YES	0.434074	0.516865		0.531216	0.446644		1.45042	2.48571
88	orf19.1274	1274				1.07189			0.9022			1.26606
89	orf19.1496	1496				1.09523			0.940862			1.36514
90	orf19.1543	OPI1				NA	1.1069		0.875383	0.957559		NA	0.870166		Rd1 BSA White cells
91	orf19.1685	ZCF7				1.10142			0.901983			1.27339
92	orf19.1926	SEF2				0.842781			0.882399			1.17064
93	orf19.1973	HAP5	YES		YES	0.466532	0.499798		0.602166	0.356344		1.31445	1.19643
94	orf19.2088	DPB4				NA			0.498473			NA
95	orf19.2119	NDT80		YES		0.904715	0.8103		0.910627	0.762311		1.45321	1.4127
96	orf19.2356	CRZ2				NA	1.00005		0.91834	1.04941		NA	1.05801		Rd1 BSA White cells
97	orf19.2476	2476				1.01736			1.00011			1.28807
98	orf19.2745	UME7				1.24093			1.13117			1.05592
99	orf19.2753	ZCF15				1.13835			1.04501			0.89987
100	orf19.2808	ZCF16				1.11171	1.20332	0.965598	0.918012	0.771358	0.791399	0.884265	1.03704	1.30357
101	orf19.2842	GZF3				1.10046			0.881718			1.29519
102	orf19.2961	2961				1.23997			0.962381			0.855657
103	orf19.3063	HFL1				0.653237	0.758847		0.682359	0.608177		0.897269	1.15714
104	orf19.3127	CZF1				NA	0.484348		1.10531	0.632164		NA	1.98066		Inconsistent Due to Opaque Filamentation Issues?
105	orf19.3625	3625				1.15148			0.941017			0.954486
106	orf19.3794	CSR1		YES	YES	0.793371	0.729589		0.950153	0.934682		1.64873	1.48895
107	orf19.4318	MIG1				1.20407	1.34273		1.03627	0.793021		1.49858	1.33069
108	orf19.4647	HAP3				1.12816			0.933936			1.06892
109	orf19.4752	MSN4				1.17072			1.01756			0.738622
110	orf19.4998	ROB1				1.00524			1.03308			0.715215
111	orf19.5249	5249				1.22568			1.00809			0.808843
112	orf19.5343	ASH1				1.0254	0.689616		0.636409	0.201912		1.07932	0.994709
113	orf19.5558	RBF1				0.690865			0.496161			0.917847
114	orf19.5729	FGR17				0.916851			0.88303			1.03251
115	orf19.5908	TEC1				1.0472			0.933185			1.06632
116	orf19.5910	5910				1.09367			1.13475			1.10013
118	orf19.6121	MNL1				1.09024			1.05509			0.993498
119	orf19.6680	FGR27				1.16236			1.05958			0.957087
120	orf19.6781	ZFU2				1.13257			1.14494			0.962289
121	orf19.6798	SSN6		YES	YES	0.733618	0.846098		0.730916	0.562674		2.14448	2.10221
122	orf19.6817	FCR1				1.07764			1.03181			0.928479
123	orf19.6888	6888				0.902945			1.07285			0.988296
124	orf19.6985	TEA1				1.25263			1.02639			0.977893
126	orf19.7247	RIM101				1.3407			1.02582			0.850455
127	orf19.7401	ISW2			YES?	0.822124	NA		0.984184	NA		2.12465	NA		Inconsistent No Growth, General Defect
128	orf19.7436	AAF1				0.97892			0.835465			0.941482
129	orf19.3193	FCR3				1.42854			1.01915			1.16515
130	orf19.4766	ARG81				0.84078			0.91317			1.16515
131	orf19.7371	ZCF35				1.17448			0.926047			0.871261
132	orf19.7381	AHR1		YES		0.889093	0.82241		0.931016	1.05327		1.57224	1.68232
133	orf19.3187	ZNC1				1.06781			0.952361			0.957087
134	orf19.4545	SWI4				1.01688	0.814091	0.708222	0.870336	0.355008	0.836461	0.76723	0.814815	1.17857
135	orf19.4573	ZCF26				0.926959			1.11077			1.03771
136	orf19.173	173				1.00407			0.95717			0.938272
137	orf19.723	BCR1				0.540854	1.0424			0.753148		0.949008	1.12983		Inconsistent Due to Opaque Filamentation Issues?
138	orf19.1187	CPH2				0.802554	0.840631		0.900948	0.950595		0.754458	0.882143
139	orf19.1275	GAT1		YES		1.00375	1.08065		1.04896	0.947701		1.53541	1.48895
140	orf19.1623	CAP1		YES		0.964285	1.1062		0.779143	0.803795		1.50343	1.56818
141	orf19.1718	ZCF8		YES	YES	1.05754	1.26376		0.974228	0.726253		1.4321	1.83712
142	orf19.2315	RTG3				0.851413			1.06931			1.05075
143	orf19.2612	2612				0.883008			0.916421			1.31413
144	orf19.3182	GIS2				0.984247	1.0336		0.764107	0.787525		1.13306	1.03175
145	orf19.3736	KAR4				1.01022	0.76911		0.975027	0.857095		0.844993	1.325
146	orf19.4767	ZCF28				1.01678			0.999243			1.02332
147	orf19.4869	SFU1				0.982483			0.907822			1.11111
148	orf19.1227	ZCF4				0.997054			1.01804			0.987654
149	orf19.1255	ZCF5				0.993827			0.984828			0.971193
150	orf19.1497	ZCF6				0.994451			0.955145			1.03978
151	orf19.1577	1577				0.883804			1.01824			1.16872
152	orf19.2054	FGR15				NA						NA			Unavoidable White Cell Contamination
153	orf19.3012	ARO80				0.999202			0.974493			1.04527
154	orf19.4649	ZCF27				0.895294			1.11115			0.946502
155	orf19.3252	DAL81				0.927296			1.00983			1.01783
156	orf19.610	EFG1	YES	YES	YES	0.708033	0.650144		1.05286	0.689329		1.5949	1.88398
157	orf19.1150	1150				1.02479			1.13458			0.979424
158	orf19.1773	RAP1				0.879684			0.900146			1.05898
159	orf19.1757	1757				0.958922			0.933631			1.23457
160	orf19.2743	2743				0.972553			1.09843			1.03704
161	orf19.4776	LYS143				0.931822			0.946319			0.932785
162	orf19.4961	STP2				0.783197			0.669992			1.14448
163	orf19.3865	RFX1				1.13098			1.08413			1.18244
164	orf19.2747	RGT1				0.984804			0.955259			1.05898
165	orf19.3986	PPR1				1.04146			0.975561			1.03978
166	orf19.2823	RFG1	YES		YES	0.700649	0.643919		0.997252	0.694952		2.01133	1.39394
167	orf19.7521	REP1				0.8341	0.787747		1.01889	0.711201		1.48725	1.35227
168	orf19.5210	5210				0.860519			0.877327			1.04801
169	orf19.4342	4342				0.908026			0.909298			0.97668
170	orf19.467	WOR3				0.752368	1.11468		1.09838	0.656029		1.39943	1.46212
171	orf19.2623	ECM22				0.888244	0.86082		1.09104	0.804567		0.872428	1.18571
172	orf19.1604	1604				1.00238			0.92899			1.1339
173	orf19.4590	RFX2				0.913866	0.958576		0.910377	0.781756		1.50997	1.38636
174	orf19.4231	PTH2				0.930971			1.11331			1.06268
177	orf19.3048	3048				0.970795			1.03423			1.09687
178	orf19.513	513				0.904813			1.02068			1.05413
179	orf19.1822	UME6				1.10804			0.978664			1.08547
180	orf19.2272	AFT2				1.00865			0.892216			1.2963
183	orf19.4433	CPH1				1.02195			0.925471			1.10256
185	orf19.7539	INO2				0.961002			0.854095			1.25212
186	orf19.2064	2064				1.06406			0.92791			1.10256
187	orf19.3845	FGR3				0.858865	1.20726		0.965737	0.804074		1.62393	1.38636
188	orf19.2752	ADR1	YES	YES	YES	NA	NA		0.97869	NA		NA	NA		No Growth, General Defect
189	orf19.7397	7397				1.07908			0.969015			1.18234
190	orf19.7098	7098				0.996681			1.08646			1.22507
191	orf19.3722	3722				0.89239			0.974011			1.08547
192	orf19.4195	4195				0.915182	1.04595		0.987293	0.74438		0.843305	1.12857
193	orf19.6173	STD1				0.935551			1.16015			0.977208
194	orf19.1481	HAP42	YES	YES	YES	0.465275	0.550588		0.681892	0.742217		1.70085	1.53788
195	orf19.1715	IRO1				0.848968			0.856877			1.38746
196	orf19.740	HAP41	YES		YES	0.503558	0.491931		0.706821	0.684336		1.2906	2.18571
197	orf19.2432	HAC1				1.02973			0.864335			1.20228
